# Supplementary material for: Interactions of amyloidogenic proteins with mitochondrial protein import machinery in aging-related neurodegenerative diseases
Source: PubMed Central journal article supplement (PMC10652799; doi:10.3389/fphys.2023.1263420), 2023-11-02
Supplement: Table1.pdf [file Table1.pdf]

**Supplementary Table 1. Mitochondrial protein import and quality control components - human and yeast homologs<sup>1</sup>**

|                                     | Complex <sup>2</sup> | Human (mammalian) <sup>3</sup> | Fungal homolog <sup>3</sup>         | Localization <sup>4</sup>                                                                      | Function <sup>5</sup>                                                                 |                                                |                                                               |
|-------------------------------------|----------------------|--------------------------------|-------------------------------------|------------------------------------------------------------------------------------------------|---------------------------------------------------------------------------------------|------------------------------------------------|---------------------------------------------------------------|
| Cytosolic targeting factors         |                      | HSP70                          | Hsp70                               | cytosol                                                                                        | ATP-dependent molecular chaperone                                                     |                                                |                                                               |
|                                     |                      | HSP90                          | Hsp90                               | cytosol                                                                                        | ATP-dependent molecular chaperone                                                     |                                                |                                                               |
|                                     |                      | NAC                            | NAC                                 | cytosol                                                                                        | Ribosome-binding factor / recruitment of RNCs to mitochondria                         |                                                |                                                               |
|                                     |                      | SYNJ2BP                        | —                                   | MOM                                                                                            | Putative mRNA binding factor                                                          |                                                |                                                               |
| TOM and SAM complexes               | TOM                  | TOM40                          | Tom40                               | MOM                                                                                            | Channel-forming $\beta$ -barrel                                                       | core complex                                   |                                                               |
|                                     |                      | TOM22                          | Tom22                               | MOM                                                                                            | Receptor / central organizer                                                          |                                                |                                                               |
|                                     |                      | TOM5                           | Tom5                                | MOM                                                                                            | Complex assembly / stabilization                                                      |                                                |                                                               |
|                                     |                      | TOM6                           | Tom6                                | MOM                                                                                            | Complex assembly / stabilization                                                      |                                                |                                                               |
|                                     |                      | TOM7                           | Tom7                                | MOM                                                                                            | Complex assembly / stabilization                                                      |                                                |                                                               |
|                                     |                      | TOM20                          | Tom20                               | MOM                                                                                            | Receptor (primarily MTSs)                                                             |                                                | receptors                                                     |
|                                     |                      | TOM70                          | Tom70                               | MOM                                                                                            | Receptor (primarily hydrophobic proteins) / chaperone                                 |                                                |                                                               |
|                                     | SAM                  | SAM50                          | Sam50                               | MOM                                                                                            | Core subunit for $\beta$ -barrel integration                                          |                                                |                                                               |
|                                     |                      | MTX1/3                         | Sam37                               | MOM                                                                                            | Accessory subunit for $\beta$ -barrel insertion / mitochondrial trafficking           |                                                |                                                               |
|                                     |                      | MTX2                           | Sam35                               | MOM                                                                                            | Accessory subunit for $\beta$ -barrel insertion / mitochondrial trafficking           |                                                |                                                               |
| TIM23 complex                       | TIM23                | TIM23                          | Tim23                               | MIM                                                                                            | Voltage-regulated protein-conducting channel                                          | core complex                                   |                                                               |
|                                     |                      | TIM17 A/B1/B2                  | Tim17                               | MIM                                                                                            | Protein-conducting channel                                                            |                                                |                                                               |
|                                     |                      | TIM50                          | Tim50                               | MIM                                                                                            | MTS receptor / phosphatase                                                            |                                                |                                                               |
|                                     |                      | TIM44                          | Tim44                               | matrix                                                                                         | Peripheral scaffold                                                                   | TIM23 <sup>MOTOR</sup> / PAM-specific subunits |                                                               |
|                                     |                      | mtHSP70 (Mortalin)             | mtHsp70 (Ssc1)                      | matrix                                                                                         | ATPase motor                                                                          |                                                |                                                               |
|                                     |                      | DNAJC15 / DNAJC19              | Tim14 (Pam18)                       | MIM                                                                                            | J-type protein cochaperone                                                            |                                                |                                                               |
|                                     |                      | MAGMAS 1/2                     | Tim16 (Pam 16)                      | MIM                                                                                            | J-type protein cochaperone                                                            |                                                |                                                               |
|                                     |                      | GrpEL1/2                       | Mge1                                | matrix                                                                                         | mtHsp70 nucleotide exchange                                                           | TIM23 <sup>SORT</sup> -specific subunits       |                                                               |
|                                     |                      | —                              | Pam17                               | MIM                                                                                            | Complex organization                                                                  |                                                |                                                               |
|                                     |                      | TIM21                          | Tim21                               | MIM                                                                                            | Sorting of MIM proteins                                                               |                                                |                                                               |
| ROMO1                               | Mgr2                 | MIM                            | Lateral integration of MIM proteins |                                                                                                |                                                                                       |                                                |                                                               |
| Mitochondrial processing peptidases | MPP                  | PMPCA                          | Mas2                                | matri                                                                                          | Metalloprotease; cleavage of MTSs from matrix-directed precursors                     |                                                |                                                               |
|                                     |                      | PMPCB                          | Mas1                                |                                                                                                |                                                                                       |                                                |                                                               |
|                                     | IMP                  | IMMP1L                         | Imp1                                | MIM                                                                                            | Serine protease; cleavage of hydrophobic sorting signals from IMS-directed precursors |                                                |                                                               |
|                                     |                      | IMMP2L                         | Imp2                                |                                                                                                |                                                                                       |                                                |                                                               |
|                                     |                      | MIP                            | Oct1                                | matrix                                                                                         | Metalloproteases; N-terminal processing of imported proteins after MPP cleavage       |                                                |                                                               |
|                                     | XPNPEP3              | Icp55                          |                                     |                                                                                                |                                                                                       |                                                |                                                               |
|                                     | PREP                 | PreP                           | matrix                              | Metalloprotease; digestion of presequences                                                     |                                                                                       |                                                |                                                               |
| Mitochondrial folding complexes     | Chaperonin           | HSP60                          | Hsp60                               | matrix                                                                                         | Forms enclosed barrel structure with central cavity                                   |                                                |                                                               |
|                                     |                      | HSP10                          | Hsp10                               |                                                                                                |                                                                                       |                                                |                                                               |
|                                     | HSP70                | mtHSP70 (Mortalin)             | mtHsp70 (Ssc1)                      | matrix                                                                                         | ATPase-driven chaperone                                                               |                                                |                                                               |
|                                     |                      | GrpEL1/2                       | Mge1                                | matrix                                                                                         | mtHsp70 nucleotide exchange                                                           |                                                |                                                               |
|                                     |                      | TID1                           | —                                   | matrix                                                                                         | mtHsp70 J-type cochaperone                                                            |                                                |                                                               |
| HSP90 paralog                       | HEP1                 | Hep1                           | matrix                              | mtHsp70 cochaperone                                                                            |                                                                                       |                                                |                                                               |
|                                     | TRAP1                | —                              |                                     | ATP-dependent molecular chaperone; great functional diversity                                  |                                                                                       |                                                |                                                               |
| Mitochondrial proteases             | m-AAA                | AFG3L2                         | Yta12                               | MIM                                                                                            | ATP-dependent metalloprotease; catalytic domain faces the matrix                      |                                                |                                                               |
|                                     |                      | SPG7 (Paraplegin)              | Yta10                               |                                                                                                |                                                                                       |                                                |                                                               |
|                                     | i-AAA                | YME1L                          | Yme1                                | MIM                                                                                            | ATP-dependent metalloprotease; catalytic domain faces the IMS                         |                                                |                                                               |
|                                     | CLPXP                | CLPP                           | —                                   | matrix                                                                                         | ATP-dependent serine protease                                                         |                                                |                                                               |
|                                     |                      | CLPX                           | Mcx1                                |                                                                                                |                                                                                       |                                                |                                                               |
|                                     |                      | LONP                           | Pim1                                |                                                                                                |                                                                                       | matrix                                         | ATP-dependent serine protease                                 |
|                                     |                      | HTRA2                          | —                                   |                                                                                                |                                                                                       | MIM                                            | Serine protease                                               |
|                                     |                      | PARL                           | Pcp1                                |                                                                                                |                                                                                       | MIM                                            | Serine protease; processing of proteins involved in mitophagy |
|                                     | OMA1                 | Oma1                           | MIM                                 | Stress-activated metalloprotease; processing proteins involved in stress response and dynamics |                                                                                       |                                                |                                                               |

<sup>1</sup>Color coding of major functional groups corresponds to that used in Figure 2.

<sup>2</sup>Common names of homo- or hetero-oligomeric assemblies that operate as a functional machinery.

<sup>3</sup>Column entries are blank where no corresponding human/mammalian or fungal homologs are known.

<sup>4</sup>For integral membrane proteins, this column indicates the membrane in which they are embedded. For soluble or peripheral proteins, this column indicates the aqueous compartment in which they reside, respectively.

<sup>5</sup>Functional features emphasize those of human/mammalian proteins and complexes.
